# Supplementary material
Source: PubMed Central journal article supplement (PMC4181020)
Supplement: hvi-10-146-s01.pdf [file hvi-10-146-s01.pdf]

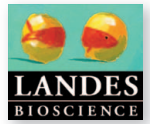

## **Supplemental Material to:**

**Jessica Leung, Subhadra Siegel, James F Jones, Cynthia Schulte, Debra Blog, D Scott Schmid, Stephanie R Bialek, and Mona Marin**

**Fatal varicella due to the vaccine-strain varicella-zoster virus**

**Human Vaccines & Immunotherapeutics 2013; 10(1)**

**<http://dx.doi.org/10.4161/hv.26200>**

**[www.landesbioscience.com/journals/vaccines/article/26200](http://www.landesbioscience.com/journals/vaccines/article/26200)**

## **Fatal varicella due to the vaccine-strain varicella-zoster virus**

**Authors:** Jessica Leung, MPH<sup>1</sup>, Subhadra Siegel, MD<sup>2</sup>, James F. Jones, MD<sup>3</sup>, Cynthia Schulte, RN, BSN<sup>4</sup>, Debra Blog, MD, MPH<sup>4</sup>, D. Scott Schmid, PhD<sup>1</sup>, Stephanie R. Bialek, MD MPH<sup>1</sup>, Mona Marin, MD<sup>1</sup>

### **Authors' affiliations:**

<sup>1</sup>National Center for Immunization and Respiratory Diseases, Centers for Disease Control and Prevention, Atlanta GA

<sup>2</sup>Department of Pediatrics, New York Medical College, New York, NY

<sup>3</sup>National Center for Emerging and Zoonotic Infectious Diseases, Centers for Disease Control and Prevention, Atlanta GA

<sup>4</sup>Bureau of Immunization, New York State Health Department, Albany, NY

### **Supplementary Online Table: Medical History**

**Data source:** Information for medical events occurring before the 7<sup>th</sup> hospitalization were obtained from the primary care provider's clinical notes. Information on the 7<sup>th</sup> hospitalization were obtained from the hospital medical records.

| <b>Age</b>                                                                | <b>Medical History</b>                                                                                                                                                                                                                                                                                                                                                                                                                                                                                                                        |
|---------------------------------------------------------------------------|-----------------------------------------------------------------------------------------------------------------------------------------------------------------------------------------------------------------------------------------------------------------------------------------------------------------------------------------------------------------------------------------------------------------------------------------------------------------------------------------------------------------------------------------------|
| 5 months                                                                  | <b>1<sup>st</sup> hospitalization:</b> RSV bronchiolitis                                                                                                                                                                                                                                                                                                                                                                                                                                                                                      |
| 5.5 months                                                                | <b>2<sup>nd</sup> hospitalization:</b> RSV pneumonia with hypoxia                                                                                                                                                                                                                                                                                                                                                                                                                                                                             |
| 6-8 months                                                                | <b>3<sup>rd</sup> hospitalization:</b> Admitted for neurologic evaluation of hypotonia and recurrent aspiration pneumonia                                                                                                                                                                                                                                                                                                                                                                                                                     |
| 8.5 months-10 months                                                      | <b>4<sup>th</sup> hospitalization:</b> Aspiration pneumonia <ul style="list-style-type: none"><li>• Gastrostomy tube placed at 9.5 months</li><li>• Muscle biopsy at 9.5 months identified type 2 fiber atrophy consistent with primary myopathic process; several types of muscular dystrophy excluded</li></ul>                                                                                                                                                                                                                             |
| 10 months                                                                 | <b>5<sup>th</sup> hospitalization:</b> Pneumonia                                                                                                                                                                                                                                                                                                                                                                                                                                                                                              |
| 12 months                                                                 | <b>Vaccinated</b> with varicella, measles, mumps, rubella, Haemophilus influenzae type b, and pneumococcal vaccines                                                                                                                                                                                                                                                                                                                                                                                                                           |
| 12 months (7 days post-vaccination)                                       | <b>6<sup>st</sup> hospitalization:</b> Admitted for respiratory distress <ul style="list-style-type: none"><li>• Treated with albuterol, budesonide, and amoxicillin clavulanate</li><li>• On Hospital day 10 (16 days post-vaccination) started on IV methylprednisolone for 3 days followed by prednisolone for 2 days</li></ul>                                                                                                                                                                                                            |
| 12.5 months (20 days post-vaccination)                                    | <b>Diagnosed with varicella by primary care provider</b> <ul style="list-style-type: none"><li>• Started on oral acyclovir</li></ul>                                                                                                                                                                                                                                                                                                                                                                                                          |
| 12.5 months-15 months (24 days post-vaccination; 4 days after rash onset) | <b>7<sup>th</sup> hospitalization:</b> Admitted with varicella for respiratory distress <ul style="list-style-type: none"><li>• Started on IV acyclovir and broad-spectrum antibiotics</li><li>• Hospital Day 4: received IV methylprednisolone for 3 days followed by 2 doses of prednisolone for 1 day</li><li>• Hospital day 11: episode of acute respiratory failure requiring intubation</li><li>• Hospital day 12: IV acyclovir discontinued</li><li>• Hospital day 19: Bronchial lavage specimen positive for vaccine-strain</li></ul> |

| Age | Medical History                                                                                                                                                                                                                                                                                                                                                                                                                                                                                                                                                                                                                                                                                                                                                           |
|-----|---------------------------------------------------------------------------------------------------------------------------------------------------------------------------------------------------------------------------------------------------------------------------------------------------------------------------------------------------------------------------------------------------------------------------------------------------------------------------------------------------------------------------------------------------------------------------------------------------------------------------------------------------------------------------------------------------------------------------------------------------------------------------|
|     | <p>VZV by PCR; Bronchial alveolar lavage specimen positive for <i>Pseudomonas aeruginosa</i> by culture</p> <ul style="list-style-type: none"><li>• Hospital day 21: IV acyclovir re-started</li><li>• Hospital days 23-26: Blood specimens positive for <i>Pseudomonas aeruginosa</i> by culture</li><li>• Hospital day 24: started on low-dose prolonged steroid therapy protocol for acute respiratory distress syndrome</li><li>• Hospital day 34: bronchial lavage specimen positive for VZV by PCR, but not genotyped</li><li>• Hospital days 20-44: urine specimens positive for <i>Candida albicans</i></li><li>• Hospital days 51-53: blood specimens positive for <i>Pseudomonas aeruginosa</i> by culture</li><li>• Hospital day 59: patient expired</li></ul> |
